# Supplementary material for: In-Vitro and In-Silico Investigation for the Spent-Coffee Bioactive Phenolics as a Promising Aflatoxins Production Inhibitor
Source: Toxins (Basel). 2023 Mar 16;15(3):225. doi: 10.3390/toxins15030225 (PMC10051990; doi:10.3390/toxins15030225)
Supplement: Supplementary file 1 [file toxins-15-00225-s001.zip › toxins-2269380-supplementary.pdf]

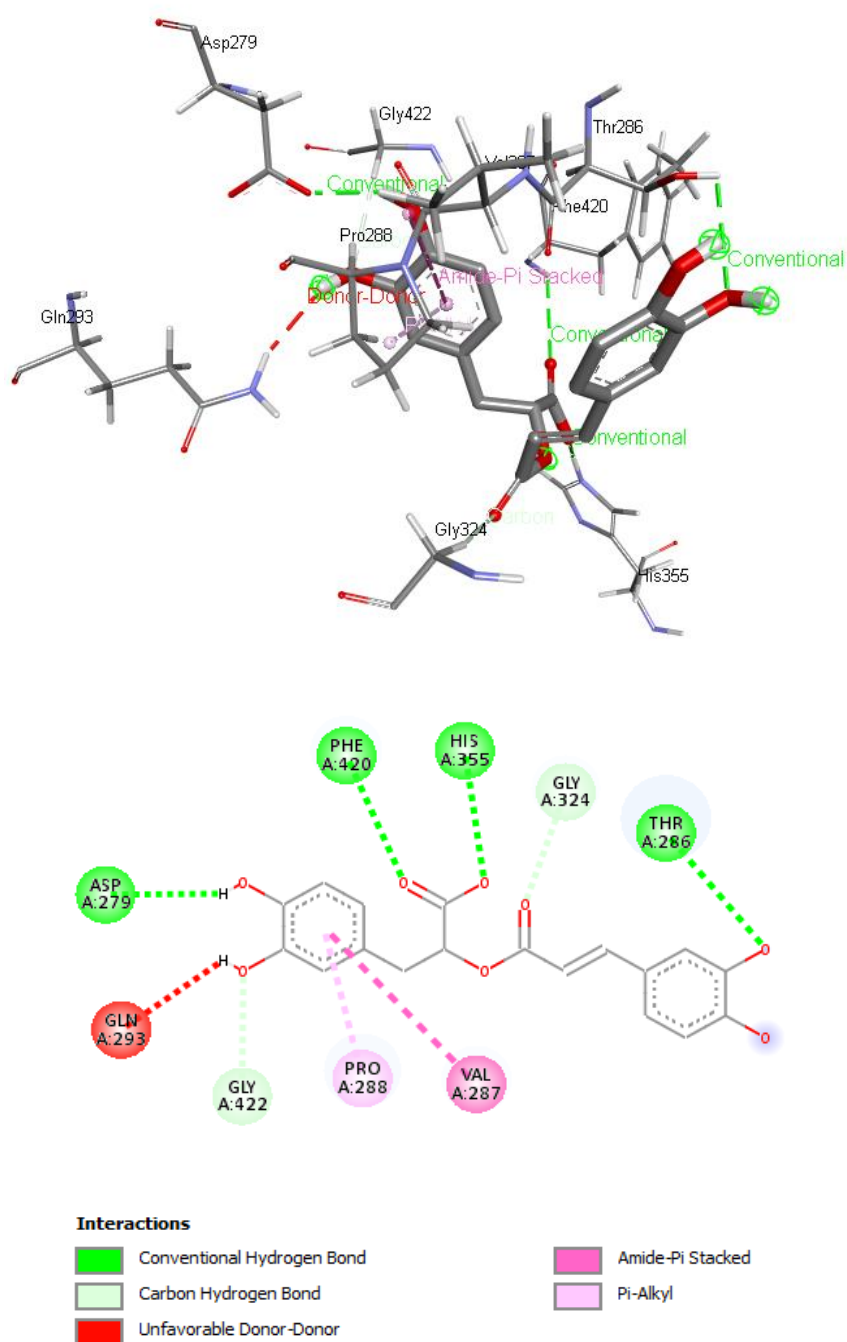

**Figure S1.** Interaction between Rosemarinic acid and Polyketide enzyme.

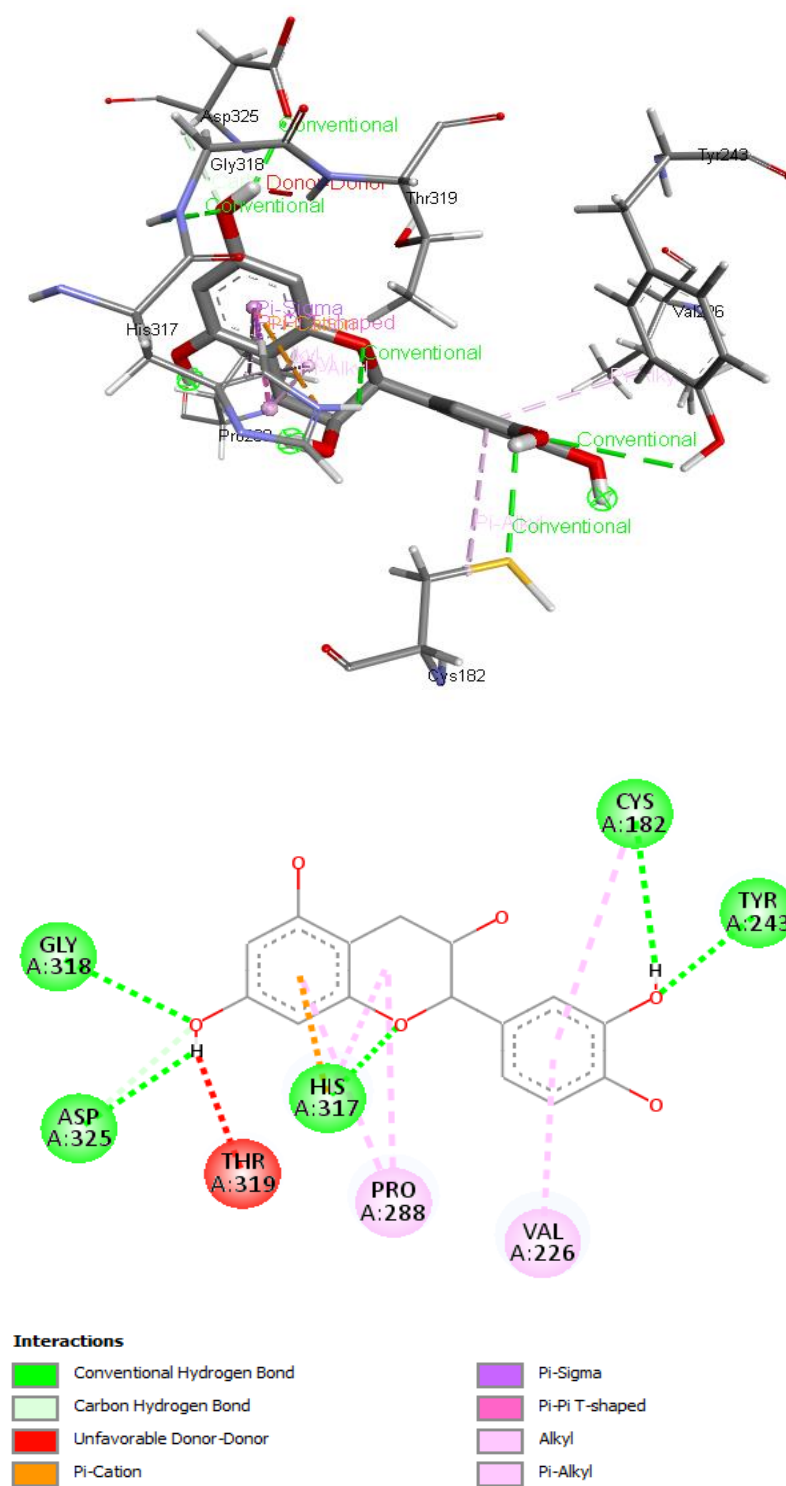

**Figure S2.** Interaction between epicatechin and Polyketide enzyme.

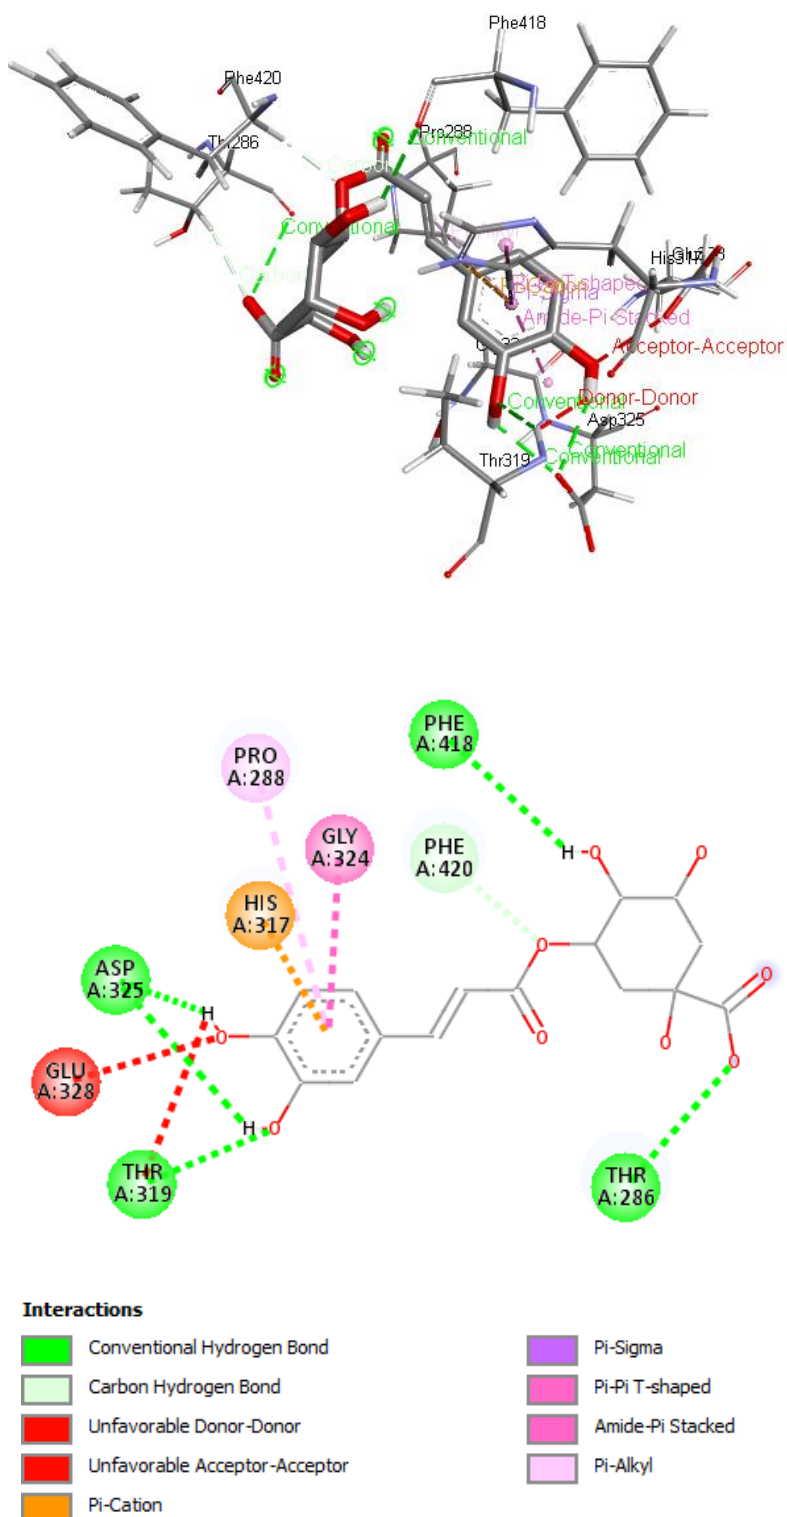

**Figure S3.** Interaction between Chlorogenic acid and Polyketide enzyme.

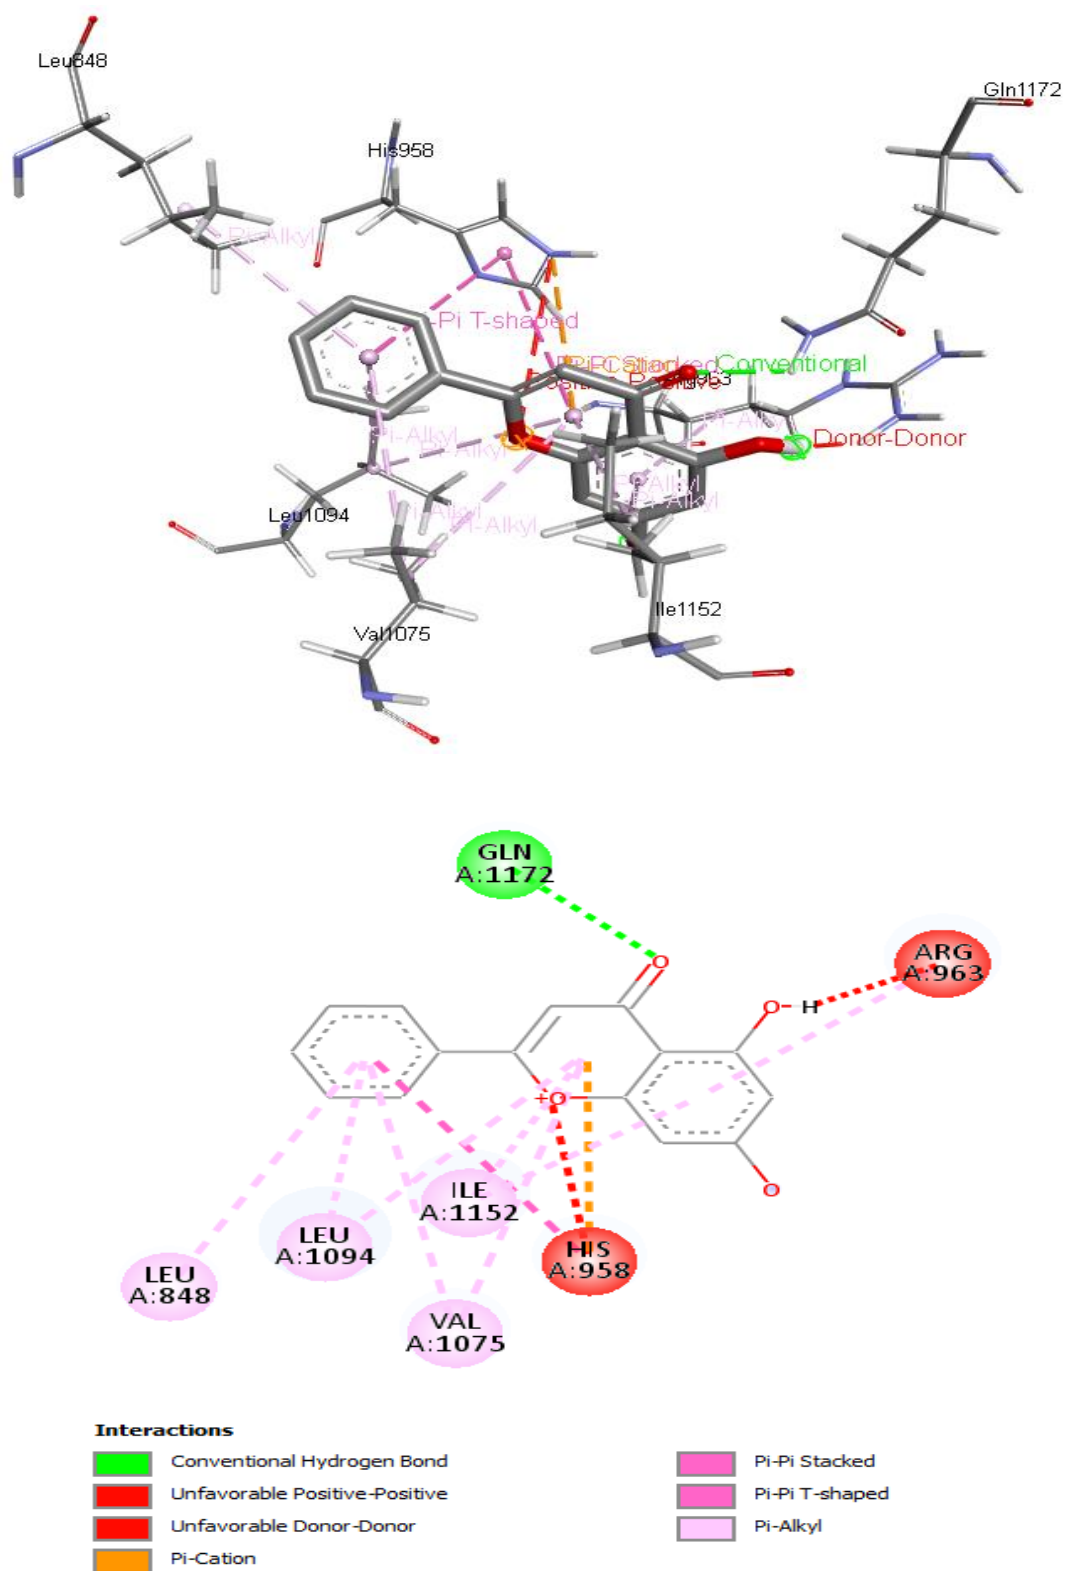

**Figure S4.** Interaction between Chrysin phenolic compound and non-ribosomal enzyme.

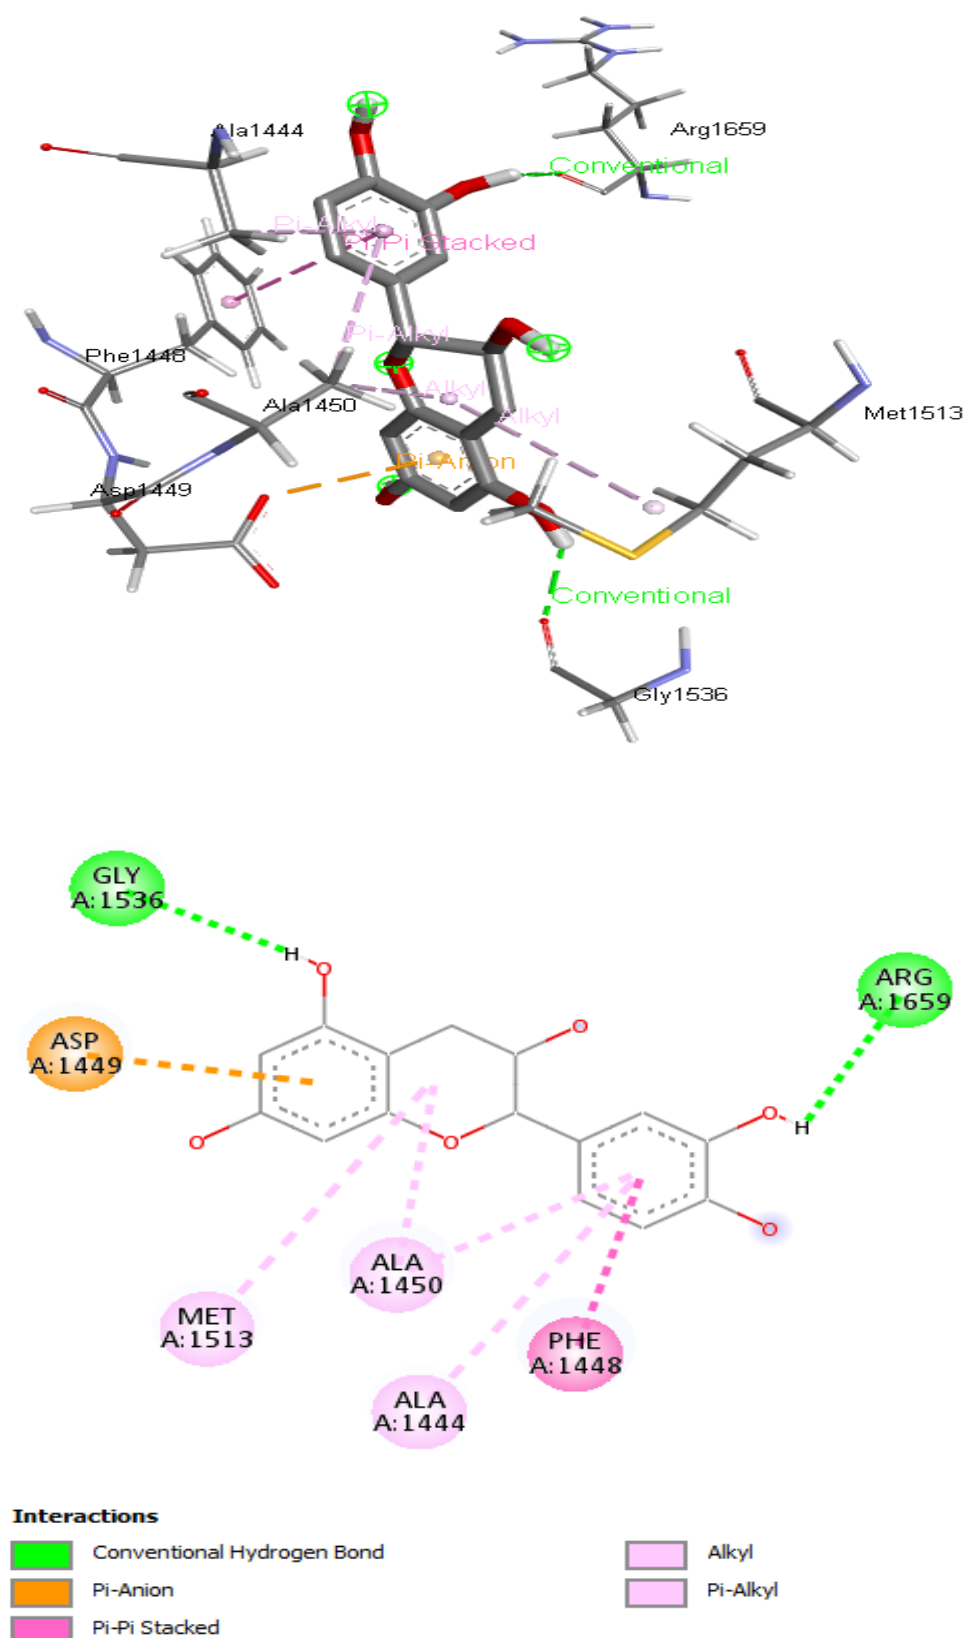

**Figure S5.** Interaction between catechin phenolic compound and non-ribosomal enzyme.
